# Supplementary material for: Integrated Multiparametric High-Content Profiling of Endothelial Cells
Source: PubMed Central journal article supplement (PMC6484530; doi:10.1177/2472555218820848), 2019-01-25
Supplement: DS_DSIC820848.pdf [file DS_DSIC820848.pdf]

## Supplemental material

### Integrated multi-parametrical high-content profiling of endothelial cells

Erika Wiseman<sup>1,2</sup>, Annj Zamuner<sup>3,4</sup>, Zuming Tang<sup>1,5</sup>, James Rogers<sup>3</sup>, Sabrina Munir<sup>1</sup>, Lucy Di Silvio<sup>3</sup>, Davide Danovi<sup>1,\*</sup>, Lorenzo Veschini<sup>3,\*</sup>

1 Stem Cell Hotel - Cell Phenotyping Platform, Centre for Stem Cells & Regenerative Medicine, King's College London, SE1 9RT, London, United Kingdom

2 Viadynamics, 52-54 Rosebery Avenue, EC1R 4RP, London, United Kingdom

3 Tissue Engineering & Biophotonics, Dental Institute, King's College London, SE1 9RT, London, United Kingdom

4 Department of Industrial Engineering, Via Marzolo, 35131, Padua, Italy

5 PerkinElmer (UK), Chalfont Road, Beaconsfield HP9 2FX, United Kingdom

\*correspondence to: [lorenzo.veschini@kcl.ac.uk](mailto:lorenzo.veschini@kcl.ac.uk) and [davide.danovi@kcl.ac.uk](mailto:davide.danovi@kcl.ac.uk)

---

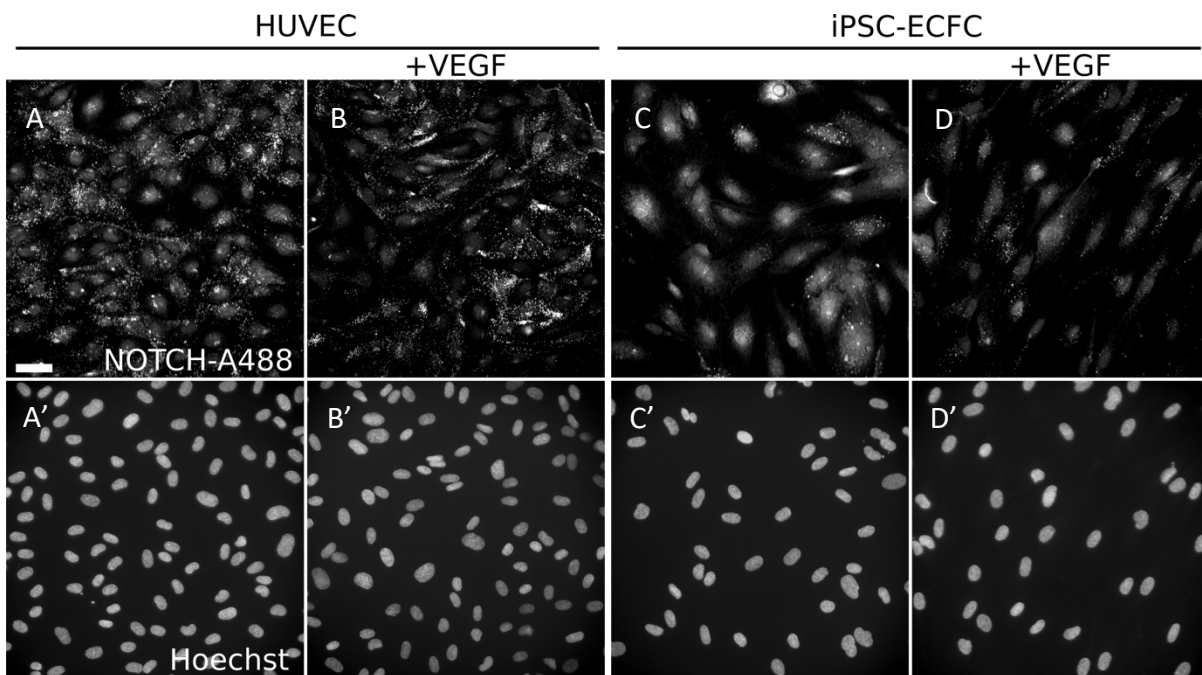

**Figure S1:** Representative images of individual NOTCH-A488 (A-D) and Hoechst (A'-D') channels for single microscopic fields (40X) under indicated experimental conditions. Scale bar = 40  $\mu$ m.

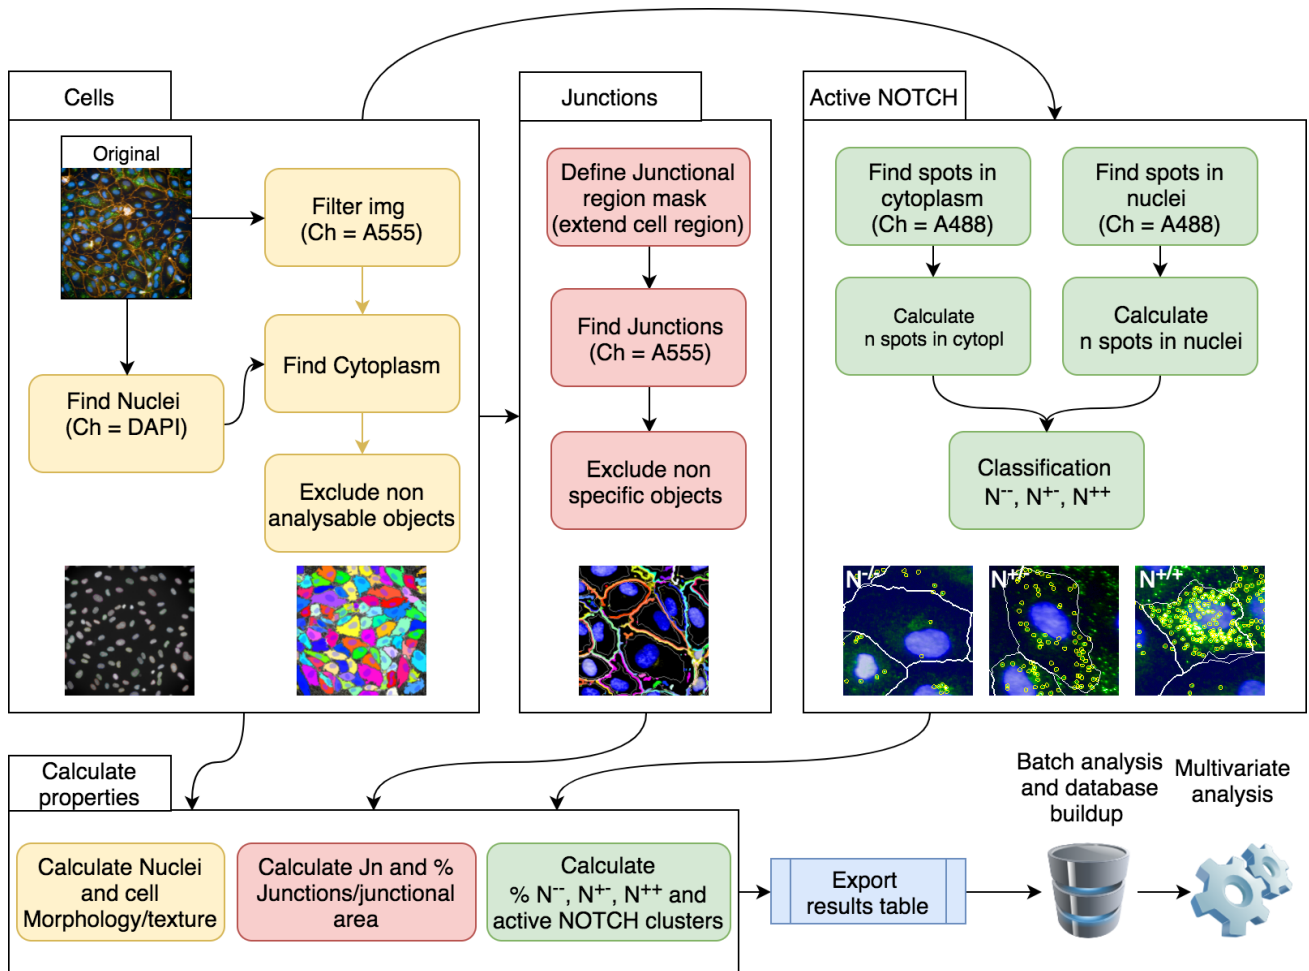

**Figure S2:** Schematics detailing the different steps to identify and measure phenotypic features (see Figure 1C and Table S1).

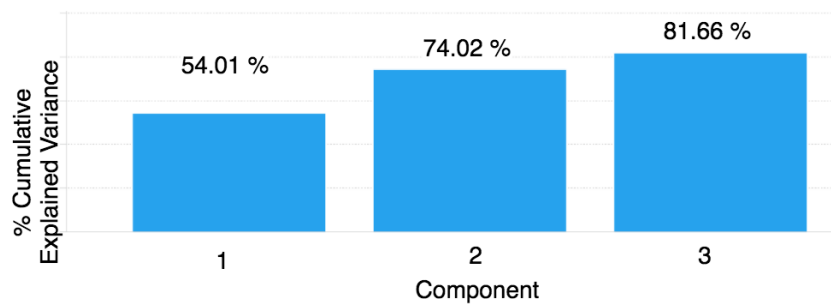

**Figure S3:** Cumulative explained variance for each Principal Component (PC). The first component (PC1) explain 54.01% of the total variance value which raises to 74.02% with PC2 and 81.66% with PC3.

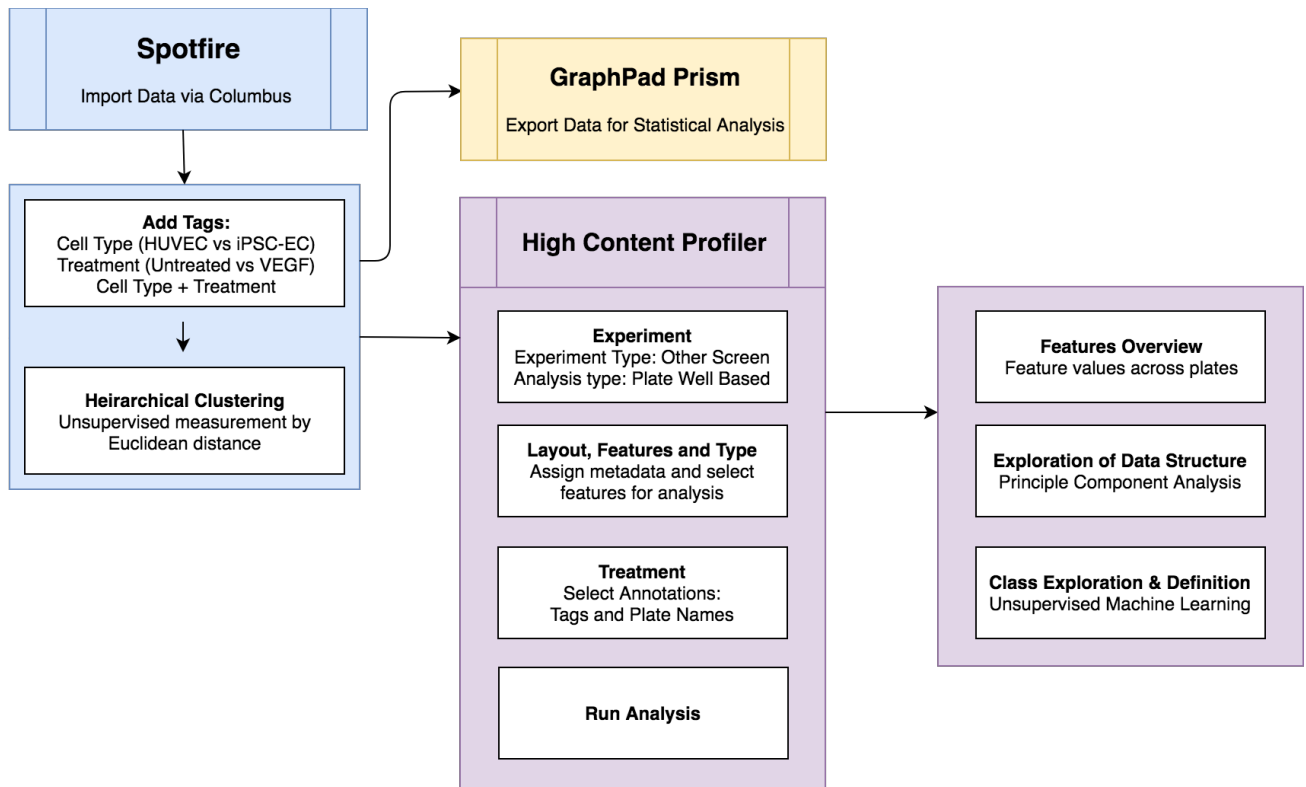

**Figure S4:** Flowchart representing the analytical post processing of data generated by the image analysis pipeline. Numerical data are collated in a single Tibco Spotfire database, tagged as appropriate and transferred to Graph Pad Prism for statistical analysis of variance (ANOVA) and to High Content Profiler for dimensionality reduction, clustering and PCA.

|                                                                                    |
|------------------------------------------------------------------------------------|
| Number of Objects                                                                  |
| % n +/+                                                                            |
| % n -/-                                                                            |
| % n +/-                                                                            |
| Jn (% n Junctions final/n nuclei= avg Jn/cell)                                     |
| NOTCH Clusters - Number of High Notch- N of High NOTCH per Cluster - Mean per Well |
| NOTCH Clusters - Number of Objects                                                 |
| NOTCH Clusters (>3 cells/cluster) - N of High NOTCH per Cluster - Mean per Well    |
| NOTCH Clusters (>3 cells/cluster) - Number of Objects                              |
| Nuclei - Number of Objects                                                         |
| Cell Morphology STAR Axial Length Ratio - Mean per Well                            |
| Cell Morphology STAR Axial Small Length - Mean per Well                            |
| Cell Morphology STAR Profile 1/5 - Mean per Well                                   |
| Cell Morphology STAR Profile 2/5 - Mean per Well                                   |
| Cell Morphology STAR Profile 3/5 - Mean per Well                                   |
| Cell Morphology STAR Profile 4/5 - Mean per Well                                   |
| Cell Morphology STAR Profile 5/5 - Mean per Well                                   |
| Cell Morphology STAR Radial Mean - Mean per Well                                   |
| Cell Morphology STAR Radial Relative Deviation - Mean per Well                     |
| Cell Morphology STAR Symmetry 02 - Mean per Well                                   |
| Cell Morphology STAR Symmetry 03 - Mean per Well                                   |
| Cell Morphology STAR Symmetry 04 - Mean per Well                                   |
| Cell Morphology STAR Symmetry 05 - Mean per Well                                   |
| Cell Morphology STAR Symmetry 12 - Mean per Well                                   |
| Cell Morphology STAR Symmetry 13 - Mean per Well                                   |
| Cell Morphology STAR Symmetry 14 - Mean per Well                                   |
| Cell Morphology STAR Symmetry 15 - Mean per Well                                   |
| Cell Morphology STAR Threshold Compactness 30% - Mean per Well                     |
| Cell Morphology STAR Threshold Compactness 40% - Mean per Well                     |
| Cell Morphology STAR Threshold Compactness 50% - Mean per Well                     |
| Cell Morphology STAR Threshold Compactness 60% - Mean per Well                     |
| Cell Morphology Width [ $\mu\text{m}$ ] (2) - Mean per Well                        |
| Nuclei Morphology Area [ $\mu\text{m}^2$ ] - Mean per Well                         |
| Nuclei Morphology Length [ $\mu\text{m}$ ] - Mean per Well                         |
| Nuclei Morphology Ratio Width to Length - Mean per Well                            |
| Nuclei Morphology Roundness - Mean per Well                                        |
| Nuclei Morphology Width [ $\mu\text{m}$ ] - Mean per Well                          |
| Cell Morphology Area [ $\mu\text{m}^2$ ] - Mean per Well                           |
| Cell Morphology Length [ $\mu\text{m}$ ] - Mean per Well                           |
| Cell Morphology Ratio Width to Length - Mean per Well                              |
| Cell Morphology Roundness - Mean per Well                                          |
| [-/-] Cells having no spots - Mean per Well                                        |
| [+/-] Cells having spots only in cytoplasm (no nuclei spots) - Mean per Well       |
| [+/+] Cells having spots in both cytoplasm & nuclei - Mean per Well                |
| [-/-] Cells having no spots - Number of Objects                                    |
| [+/-] Cells having spots only in cytoplasm (no nuclei spots) - Number of Objects   |
| [+/+] Cells having spots in both cytoplasm & nuclei - Number of Objects            |

**Table S1:** List of the 47 phenotypic features measured in our pipeline. Features highlighted in red correspond to the red dots in Figure 3 A.

|                                                                                                                         |                                                                                   |                                                                                                                                                                                                                           |
|-------------------------------------------------------------------------------------------------------------------------|-----------------------------------------------------------------------------------|---------------------------------------------------------------------------------------------------------------------------------------------------------------------------------------------------------------------------|
| <b>Input Image</b>                                                                                                      | <b>Stack Processing :</b><br>Maximum Projection<br>Flatfield Correction : None    |                                                                                                                                                                                                                           |
| <b>Find Nuclei</b><br>Output Population : Nuclei                                                                        | <b>Channel :</b> DAPI ROI : None                                                  | <b>Method : B</b><br>Common Threshold : 0.4<br>Area : > 30 µm <sup>2</sup><br>Split Factor : 7.0<br>Individual Threshold : 0.4<br>Contrast : > 0.1                                                                        |
| <b>Filter Image</b><br>Output Image : Sliding Parabola                                                                  | <b>Channel :</b> Alexa 555                                                        | <b>Method :</b> Sliding Parabola<br>Curvature : 4                                                                                                                                                                         |
| <b>Filter Image</b><br>Output Image : VEC SER Edge                                                                      | <b>Channel :</b> Sliding Parabola                                                 | <b>Method :</b> Texture SER<br>Filter : SER Edge<br>Scale : 3 px<br>Normalization by : Kernel                                                                                                                             |
| <b>Filter Image</b><br>Output Image : Inverted VEC SER Edge                                                             | <b>Channel :</b> VEC SER Edge                                                     | <b>Method :</b> Invert Image<br>Cut-off Quantile : 90                                                                                                                                                                     |
| <b>Find Cytoplasm</b>                                                                                                   | <b>Channel :</b> Inverted VEC SER Edge<br><b>Nuclei :</b> Nuclei                  | <b>Method : A</b><br>Individual Threshold : 0.25                                                                                                                                                                          |
| <b>Calculate Morphology Properties</b><br>Output Properties : Cell Morphology                                           | <b>Population :</b> Nuclei<br><b>Region :</b> Cell                                | <b>Method :</b> Standard<br>Area<br>Roundness<br>Width<br>Length<br>Ratio Width to Length                                                                                                                                 |
| <b>Select Population</b><br>Output Population : Nuclei Selected                                                         | <b>Population :</b> Nuclei                                                        | <b>Method :</b> Common Filters<br>Remove Border Objects<br>Region : Cell                                                                                                                                                  |
| <b>Select Population</b><br>Output Population : Nuclei Selected Final                                                   | <b>Population :</b> Nuclei Selected                                               | <b>Method :</b> Filter by Property<br>Cell morphology Area [µm <sup>2</sup> ] : > 200                                                                                                                                     |
| <b>Calculate Morphology Properties</b><br>Output Properties : Nuclei Morphology                                         | <b>Population :</b> Nuclei Selected Final<br><b>Region :</b> Nucleus              | <b>Method :</b> Standard<br>Area<br>Roundness<br>Width<br>Length<br>Ratio Width to Length                                                                                                                                 |
| <b>Calculate Morphology Properties</b><br>Output Properties : Cell Morphology                                           | <b>Population :</b> Nuclei Selected Final<br><b>Region :</b> Cell                 | <b>Method :</b> Standard<br>Area<br>Roundness<br>Width<br>Length<br>Ratio Width to Length                                                                                                                                 |
| <b>Calculate Morphology Properties</b><br>Output Properties : Cell Morphology STAR                                      | <b>Population :</b> Nuclei Selected Final<br><b>Region :</b> Cell                 | <b>Method :</b> Standard<br>Channel : Alexa 488<br>Symmetry<br>Threshold Compactness<br>Axial<br>Radial<br>Profile<br>Profile Inner Region : Nucleus<br>Profile Width : 4 px<br><b>Sliding Parabola</b><br>Curvature : 10 |
| <b>Filter Image</b><br>Output Image : VEC SER Ridge                                                                     | <b>Channel :</b> Alexa 555                                                        | <b>Method :</b> Texture SER<br>Filter : SER Ridge<br>Scale : 5 px<br>Normalization by : Region Intensity                                                                                                                  |
| <b>Find Image</b><br>Output Population : Junctions Points<br>Output Region : Junctions Region                           | <b>Channel :</b> VEC SER Ridge<br><b>ROI :</b> None                               | <b>Method :</b> Common Threshold<br>Threshold : 0.8<br>Split into Objects<br>Area : > 200 px <sup>2</sup>                                                                                                                 |
| <b>Select Region</b><br>Output Region : Junctions Region Selected                                                       | <b>Population :</b> Junctions points<br><b>Region :</b> Junctions region          | <b>Method :</b> Restrict by Mask<br>Population : Nuclei<br>Mask Region : Nucleus<br>Use Inverted Mask                                                                                                                     |
| <b>Modify Population</b><br>Output Population : Number of Junctions final<br>Output Region : Selected Junctional region | <b>Population :</b> Junctions Points<br><b>Region :</b> Junctions Region Selected | <b>Method :</b> Cluster by Distance<br>Distance : 0 px<br>Area : > 150 px <sup>2</sup>                                                                                                                                    |
| <b>Find Spots</b><br>Output Population : Spots in cytoplasm selected                                                    | <b>Channel :</b> Alexa 488<br><b>ROI :</b> Nuclei Selected final / Cytoplasm      | <b>Method : C</b><br>Radius : ≤ 7 px<br>Contrast : > 0.15<br>Uncorrected Spot to Region<br>Intensity : > 1<br>Distance : ≥ 3 px<br>Spot Peak Radius : 0.8 px<br>Calculate Spot Properties                                 |

|                                                                                                                                                                                                                                                                                                                                                                                                                                                                                                                                                                                                                                                                                                                                                                                                                                                                                                                            |                                                                                                                                                                                                                                                                                  |                                                                                                                                                                                                                                                                                                                                                                                                                                                                                                                                                                                                                                                                                                                                                                                                                                                                                                                                                                                                                                  |
|----------------------------------------------------------------------------------------------------------------------------------------------------------------------------------------------------------------------------------------------------------------------------------------------------------------------------------------------------------------------------------------------------------------------------------------------------------------------------------------------------------------------------------------------------------------------------------------------------------------------------------------------------------------------------------------------------------------------------------------------------------------------------------------------------------------------------------------------------------------------------------------------------------------------------|----------------------------------------------------------------------------------------------------------------------------------------------------------------------------------------------------------------------------------------------------------------------------------|----------------------------------------------------------------------------------------------------------------------------------------------------------------------------------------------------------------------------------------------------------------------------------------------------------------------------------------------------------------------------------------------------------------------------------------------------------------------------------------------------------------------------------------------------------------------------------------------------------------------------------------------------------------------------------------------------------------------------------------------------------------------------------------------------------------------------------------------------------------------------------------------------------------------------------------------------------------------------------------------------------------------------------|
| <p><b>Calculate Properties</b><br/>Output Properties : per Cell</p>                                                                                                                                                                                                                                                                                                                                                                                                                                                                                                                                                                                                                                                                                                                                                                                                                                                        | <p><b>Population</b> : Nuclei Selected final</p>                                                                                                                                                                                                                                 | <p><b>Method</b> : By Related Population<br/>Related Population : Spots in cytoplasm selected<br/>Number of Spots in cytoplasm selected</p>                                                                                                                                                                                                                                                                                                                                                                                                                                                                                                                                                                                                                                                                                                                                                                                                                                                                                      |
| <p><b>Find Spots</b><br/>Output Population : Spots in cytoplasm selected</p>                                                                                                                                                                                                                                                                                                                                                                                                                                                                                                                                                                                                                                                                                                                                                                                                                                               | <p><b>Channel</b> : Alexa 488<br/><b>ROI</b> : Nuclei Selected final / Nuclei</p>                                                                                                                                                                                                | <p><b>Method</b> : C<br/>Radius : <math>\leq 7</math> px<br/>Contrast : <math>&gt; 0.15</math><br/>Uncorrected Spot to Region<br/>Intensity : <math>&gt; 1</math><br/>Distance : <math>\geq 3</math> px<br/>Spot Peak Radius : 0.8 px<br/>Calculate Spot Properties</p>                                                                                                                                                                                                                                                                                                                                                                                                                                                                                                                                                                                                                                                                                                                                                          |
| <p><b>Calculate Properties</b><br/>Output Properties : per Cell</p>                                                                                                                                                                                                                                                                                                                                                                                                                                                                                                                                                                                                                                                                                                                                                                                                                                                        | <p><b>Population</b> : Nuclei Selected final</p>                                                                                                                                                                                                                                 | <p><b>Method</b> : By Related Population<br/>Related Population : Spots in cytoplasm selected<br/>Number of Spots in nuclei selected</p>                                                                                                                                                                                                                                                                                                                                                                                                                                                                                                                                                                                                                                                                                                                                                                                                                                                                                         |
| <p><b>Select Population</b><br/>Output Population : [-/-] Cells having no spots</p>                                                                                                                                                                                                                                                                                                                                                                                                                                                                                                                                                                                                                                                                                                                                                                                                                                        | <p><b>Population</b> : Nuclei Selected final</p>                                                                                                                                                                                                                                 | <p><b>Method</b> : Filter by Property<br/>F1 : Number of Spots in cytoplasm selected- per Cell <math>&lt; 3</math><br/>F2 : Number of Spots in nuclei selected- per Cell <math>&lt; 3</math><br/>Boolean Operations : F1 and F2</p>                                                                                                                                                                                                                                                                                                                                                                                                                                                                                                                                                                                                                                                                                                                                                                                              |
| <p><b>Select Population</b><br/>Output Population : [+/-] Cells having spots</p>                                                                                                                                                                                                                                                                                                                                                                                                                                                                                                                                                                                                                                                                                                                                                                                                                                           | <p><b>Population</b> : Nuclei Selected final</p>                                                                                                                                                                                                                                 | <p><b>Method</b> : Filter by Property<br/>F1 : Number of Spots in cytoplasm selected- per Cell <math>\geq 3</math><br/>F2 : Number of Spots in nuclei selected- per Cell <math>&lt; 3</math><br/>Boolean Operations : F1 and F2</p>                                                                                                                                                                                                                                                                                                                                                                                                                                                                                                                                                                                                                                                                                                                                                                                              |
| <p><b>Select Population</b><br/>Output Population : [+/+] Cells having spots</p>                                                                                                                                                                                                                                                                                                                                                                                                                                                                                                                                                                                                                                                                                                                                                                                                                                           | <p><b>Population</b> : Nuclei Selected final</p>                                                                                                                                                                                                                                 | <p><b>Method</b> : Filter by Property<br/>F1 : Number of Spots in cytoplasm selected- per Cell <math>\geq 3</math><br/>F2 : Number of Spots in nuclei selected- per Cell <math>\geq 3</math><br/>Boolean Operations : F1 and F2</p>                                                                                                                                                                                                                                                                                                                                                                                                                                                                                                                                                                                                                                                                                                                                                                                              |
| <p><b>Select Population</b><br/>Output Population : High NOTCH</p>                                                                                                                                                                                                                                                                                                                                                                                                                                                                                                                                                                                                                                                                                                                                                                                                                                                         | <p><b>Population</b> : Nuclei Selected final</p>                                                                                                                                                                                                                                 | <p><b>Method</b> : Filter by Property<br/>F1 : Number of Spots / area cytoplasm <math>\geq 15</math><br/>F2 : Number of Spots / area Nucleus <math>\geq 3</math><br/>F3 : Number of Spots in nuclei selected- per Cell <math>\geq 10</math><br/>Boolean Operations : F1 and F2 or F3</p>                                                                                                                                                                                                                                                                                                                                                                                                                                                                                                                                                                                                                                                                                                                                         |
| <p><b>Modify Population</b><br/>Output Population : NOTCH clusters<br/>Output Region : NOTCH cluster region</p>                                                                                                                                                                                                                                                                                                                                                                                                                                                                                                                                                                                                                                                                                                                                                                                                            | <p><b>Population</b> : High Notch<br/><b>Region</b> : Cell</p>                                                                                                                                                                                                                   | <p><b>Method</b> : Cluster by Distance<br/>Distance : 2 <math>\mu\text{m}</math><br/>Area : <math>&gt; 0 \mu\text{m}^2</math><br/>Fill Holes</p>                                                                                                                                                                                                                                                                                                                                                                                                                                                                                                                                                                                                                                                                                                                                                                                                                                                                                 |
| <p><b>Calculate Properties</b><br/>Output Properties : N of High NOTCH per Cluster</p>                                                                                                                                                                                                                                                                                                                                                                                                                                                                                                                                                                                                                                                                                                                                                                                                                                     | <p><b>Population</b> : NOTCH Clusters</p>                                                                                                                                                                                                                                        | <p><b>Method</b> : By Related Population<br/>Related Population : High Notch<br/>Number of High Notch</p>                                                                                                                                                                                                                                                                                                                                                                                                                                                                                                                                                                                                                                                                                                                                                                                                                                                                                                                        |
| <p><b>Select Population</b><br/>Output Population : NOTCH Clusters (<math>&gt; 3</math>/cluster)</p>                                                                                                                                                                                                                                                                                                                                                                                                                                                                                                                                                                                                                                                                                                                                                                                                                       | <p><b>Population</b> : NOTCH Clusters</p>                                                                                                                                                                                                                                        | <p><b>Method</b> : Filter by Property<br/>High NOTCH per Cluster : <math>\geq 3</math></p>                                                                                                                                                                                                                                                                                                                                                                                                                                                                                                                                                                                                                                                                                                                                                                                                                                                                                                                                       |
| <p><b>Define Results</b></p>                                                                                                                                                                                                                                                                                                                                                                                                                                                                                                                                                                                                                                                                                                                                                                                                                                                                                               |                                                                                                                                                                                                                                                                                  |                                                                                                                                                                                                                                                                                                                                                                                                                                                                                                                                                                                                                                                                                                                                                                                                                                                                                                                                                                                                                                  |
| <p><b>Method</b> : List of Outputs<br/><b>Population</b> : Nuclei Selected final<br/>Number of Objects<br/>Cell morphology Area [<math>\mu\text{m}^2</math>]<br/>Cell morphology Roundness<br/>Cell morphology Width [<math>\mu\text{m}</math>]<br/>Cell morphology Length [<math>\mu\text{m}</math>]<br/>Cell morphology Ratio Width to Length<br/>Nuclei morphology Area [<math>\mu\text{m}^2</math>]<br/>Nuclei morphology Roundness<br/>Nuclei morphology Width [<math>\mu\text{m}</math>]<br/>Nuclei morphology Length [<math>\mu\text{m}</math>]<br/>Nuclei morphology Ratio Width to Length<br/>STAR Properties (Cell Morphology STAR)<br/><b>Population</b> : [-/-] Cells having no spots<br/>Number of Objects<br/><b>Population</b> : [+/-] Cells having spots only in cytoplasm<br/>Number of Objects<br/><b>Population</b> : [+/+] Cells having spots in both cytoplasm &amp; nuclei<br/>Number of Objects</p> | <p>Mean per well<br/>Mean per well</p> | <p><b>Method</b> : Formula Output<br/>Formula : a/b<br/>Variable A : Number of Junctions final - Number of Objects<br/>Variable B : Nuclei - Number of Objects<br/>Output Name : Jn (% n Junctions final/n nuclei)</p> <p><b>Method</b> : Formula Output<br/>Formula : a/b*100<br/>Population Type : Objects<br/>Variable A : [-/-] Cells having no spots - Number of Objects<br/>Variable B : Nuclei Selected final - Number of Objects<br/>Output Name : % n-/-</p> <p><b>Method</b> : Formula Output<br/>Formula : a/b*100<br/>Population Type : Objects<br/>Variable A : [+/-] Cells having spots only in cytoplasm (no nuclei spots) - Number of Objects<br/>Variable B : Nuclei Selected final - Number of Objects<br/>Output Name : % n+/-</p> <p><b>Method</b> : Formula Output<br/>Formula : a/b*100<br/>Population Type : Objects<br/>Variable A : [+/+] Cells having spots in both cytoplasm &amp; nuclei - Number of Objects<br/>Variable B : Nuclei Selected final - Number of Objects<br/>Output Name : % n+/-</p> |

**Table S2:** High content pipeline extracted from Columbus, colours correspond to Figure 1C and S2. Each step is detailed to allow replication in other software.
